# Supplementary material for: Metabolic Stimulation-Elicited Transcriptional Responses and Biosynthesis ofAcylated Triterpenoids in the Medicinal Plant Helicteres Angustifolia
Source: Research Square preprint supplement (doi:10.21203/rs.3.rs-395080/v1), 2021-04-08
Supplement: Supplementary file 2 [file 1b12cf96460dba2c20278aa0.doc]

Table S3 Gene-specific forward and reverse primers

| Primer | Sequence |
| --- | --- |
| pESC-TRP-*HaOSC1*F | aatttttgaaaattcgaattcATGTGGAAGCTGAAGATAGCAGAA |
| pESC-TRP-Ha*OSC1*R | agaattgttaattaagagctcTCAATGATGATGATGATGATGTATGGATTGGACCAAATTGGC |
| pESC-TRP-*HaOSC2*F | gaatttttgaaaattcgaattcATGTGGAAGCTTAAGATTGCAGAG |
| pESC-TRP-*HaOSC2*R | ggcgaagaattgttaattaagagctcTCAATGATGATGATGATGATGAACCATTTTTGCA |
| pESC-TRP-*HaOSC3*F | gaatttttgaaaattcgaattcATGTGGAAACTGGAGATAGCAGAA |
| pESC-TRP-*HaOSC3*R | ggcgaagaattgttaattaagagctcTTAATGATGATGATGATGATGTGAAGGTGAGAGCACATGTTTATA |
| pESC-TRP-*HaCYPi1*F | ctatagggcccgggcgtcgacATGGCGTCAACCTTGGAGACGG |
| pESC-TRP-HaCYPi1R | ttagagcggatcttagctagcTCAATGATGATGATGATGATGAATGACGCTTCCCATATTG |
| pESC-TRP-*HaCYPi2*F | ctatagggcccgggcgtcgacATGTGTGTCCTCACAACTACACCCTT |
| pESC-TRP-*HaCYPi2*R | ttagagcggatcttagctagcTTAATGATGATGATGATGATGTACATTATTAATTGGTATGGGCTCCACCACCA |
| pESC-TRP-*HaCYPi3*F | ctatagggcccgggcgtcgacATGGCTACAAAAGTAGTCAGGCCC |
| pESC-TRP-*HaCYPi3*R | ttagagcggatcttagctagcTTAATGATGATGATGATGATGTTTGACAATCAGTGGAATGGGTCGAAC |
| pESC-TRP-*HaCYPi4*F | ctatagggcccgggcgtcgacATGGAGCCTGAGGCTTCGAGGAG |
| pESC-TRP-*HaCYPi4*R | ttagagcggatcttagctagcTTAATGATGATGATGATGATGTTTCAACCACGGGTGGAATGGG |
| pCOLD-TF -*HaTAT1*F | gaaggtaggcatatggagctcATGATGAAAGGTGTTCGATGTATCTC |
| pCOLD-TF-*HaTAT1*R | caggtcgacaagcttgaattcTTAAACCGTGACTGTATCCATGAAT |
| pCOLD-TF–*HaTAT2*F | gaaggtaggcatatggagctcATGCCTTCTTCTTCAGTTACTCTTGTT |
| pCOLD-TF-*HaTAT2*R | caggtcgacaagcttgaattcTCACACCATTTCTGATACGTACTGC |
| pCOLD-TF-*HaTBT*F | gaaggtaggcatatggagctcATGGCATTGCTACCAACCAATAC |
| pCOLD-TF-*HaTBT*R | caggtcgacaagcttgaattcTTAAAGTGAATTTCTAATGAACAACTTCTT |
