# Supplementary material for: Metabolic Stimulation-Elicited Transcriptional Responses and Biosynthesis ofAcylated Triterpenoids in the Medicinal Plant Helicteres Angustifolia
Source: Research Square preprint supplement (doi:10.21203/rs.3.rs-395080/v1), 2021-04-08
Supplement: Supplementary file 4 [file 9a11ecb743f7838aed1ac37f.doc]

Table S12 Analysis of physicochemical properties of target gene coding proteins

| Protein  name | Protein  length | molecular weight( KD) | Molecular formula | Isoelectric point | instability index | Hydrophilicity coefficient |
| --- | --- | --- | --- | --- | --- | --- |
| HaOSC1 | 756aa | 86.44 | C3907H5939N1049O1105S36 | 6.03 | 45.70 | -0.302 |
| HaOSC2 | 762aa | 87.79 | C3990H6050N1046O1101S47 | 6.25 | 50.25 | -0.277 |
| HaOSC3 | 767aa | 86.67 | C3923H5960N1032O1125S34 | 5.80 | 48.78 | -0.232 |
| HaCYPi1 | 485aa | 55.02 | C2552H3917N645O678S17 | 8.94 | 41.77 | -0.106 |
| HaCYPi2 | 395aa | 44.69 | C2078H3211N521O553S11 | 9.03 | 35.77 | -0.030 |
| HaCYPi3 | 486aa | 54.80 | C2530H3934N644O680S17 | 9.30 | 39.97 | -0.060 |
| HaCYPi4 | 478aa | 54.11 | C2477H3866N638O670S25 | 9.33 | 45.85 | -0.12 |
| HaTAT1 | 438aa | 48.71 | C2180H3387N589O641S19 | 6.10 | 34.35 | -0.144 |
| HaTAT2 | 465aa | 51.18 | C2291H3595N615O676S19 | 8.44 | 34.72 | -0.155 |
| HaTBT | 453aa | 50.58 | C2281H3595N606O646S23 | 6.28 | 45.24 | -0.007 |
